# Supplementary material
Source: Springer Nature journal article supplement (https://www.springermedizin.de/resource/supplementary/12879_2014_3135_MOESM4_ESM.docx/9446046)
Supplement: MOESM4 [file 9446046]

| **Table 2.** Monthly drug use density (expressed as RDD per 100 patient days) trends in the medical service pre- (baseline) and post-intervention as estimated in a single-level interrupted time-series model (P values in parentheses). | | | | | | |
| --- | --- | --- | --- | --- | --- | --- |
|  |  |  |  | |  | |
|  | Cephalo-sporins | Fluoro-quinolones | | Penicillins | | TOTAL |
| Baseline | -0.02 | -0.10 | -0.03 | | -0.13 | |
| trend β1 | (ns) | (<0.001) | (ns) | | (0.038) | |
| Post-intervention | -0.52  (<0.001) | -0.40  (<0.001) | +0.34  (<0.001) | | -1.10  (<0.001) | |
| trend change β2 |  |  |  | |  | |
| Intercept β0 | 16.61 | 19.96 | 16.11 | | 88.73 | |
|  | (<0.001) | (<0.001) | (<0.001) | | (<0.001) | |
| N | 63 | 63 | 63 | | 63 | |
